# Supplementary material for: Lanthanide and alkaline-earth complexes of EDTA in water: a molecular dynamics study of structures and binding selectivities †
Source: Royal Society of Chemistry journal article supplement (doi:10.1039/a908879b), 2000-01-01
Supplement: a908879b.doc [file a908879b.doc]

**Supplementary data**

**Lanthanide and alkaline-earth complexes of EDTA in water: a molecular dynamics study of structures and binding selectivities**

**Sylvie Durand,*a* Jean-Pierre Dognon,*a* Catherine Rabbe*a* and Georges Wipff**b***

*a Laboratoire de Chimie Théorique et Structurale, Commissariat à l'Energie Atomique, CEA/Valrhô, Centre de Marcoule, BP 171, 30200 Bagnols-sur-Cèze, France*

*b Laboratoire de Modélisation et Simulations Moléculaires, Institut de Chimie, Université Louis Pasteur, 4 rue Blaise Pascal, 67000 Strasbourg, France*


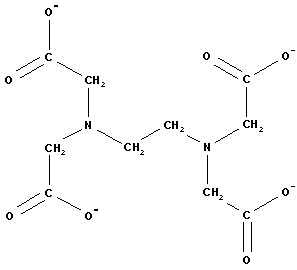


**Fig. S1** Schematic representation of EDTA4– (**L**).


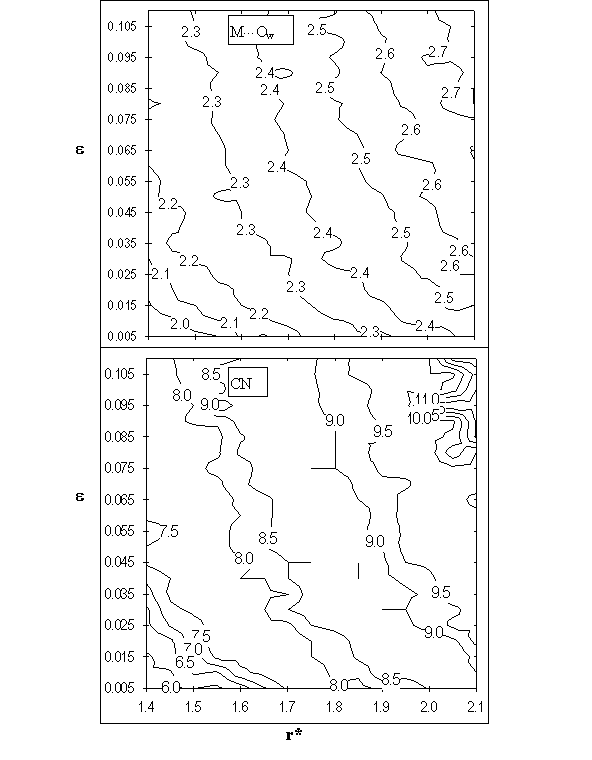


**Fig. S2** Calculated lanthanide–water M3+···OW distances, in Å, (top) and lanthanide coordination numbers CN (bottom) as a function of *r** (Å) and *ε* (kcal mol–1) cation parameters.


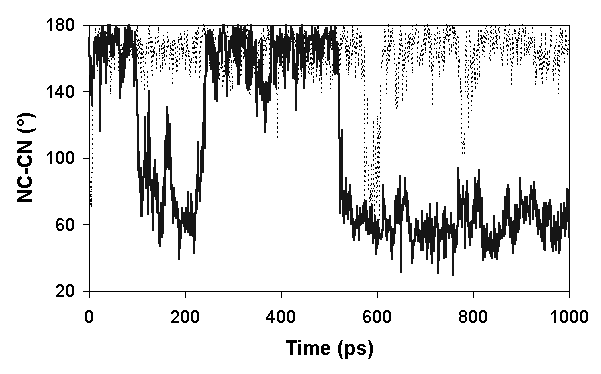


**Fig. S3** The uncomplexed **L** (dotted line) and **L**·Na+ (solid line) systems: angle NC–CN as a function of time.


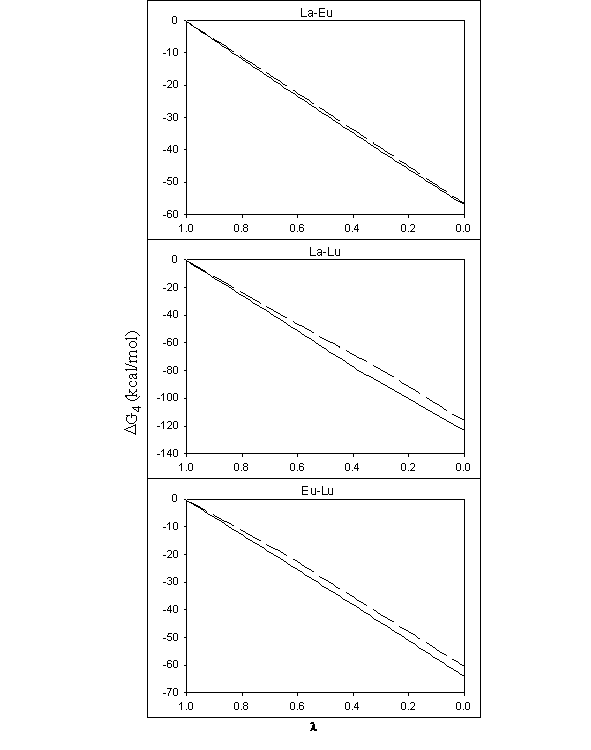


**Fig. S4** FEP calculations of *endo* **L**·M3+ complexes in water: Δ*G*4 as a function of *λ*. Fromtop to bottom: La3+–Eu3+; La3+–Lu3+; Eu3+–Lu3+ mutations.
